# Supplementary material for: Transcription Factor MdPLT1 Involved Adventitious Root Initiation in Apple Rootstocks
Source: MDPI journal article supplement (doi:10.3390/horticulturae10010064), 2024-01-09
Supplement: s1 [file s1]

## Supplementary Material

### Supplementary Figure S1. *MdPLT1* presumably encodes an amino acid sequence

```
1 ATGGGGTCCATGAATTCAAACAACGGCTTTCCTTTCTCTTCTCCTACTAATTCTTCC
1 M G S M N S N N W L S F P L S P T N S S
61 TTGCCATCAGAACTTCACCTTCTCACTCTCATCAATTCTCTAGGGTTAGTAAATGAG
21 L P S E L H P S H S H Q F S L G L V N E
121 ACCATGGACAACCCTTCCAAAACCAAGAGTGGAATATGATTAATACTCAAGGAAGCGAT
41 T M D N P F Q N Q E W N M I N T Q G S D
181 GAAGCTCCAAAGGTGGCTGATTTTCTTGGCGTGAGCAAATCCGAGAACCAGCTCAGATCTT
61 E A P K V A D F L G V S K S E N H S D L
241 GTAGCCTTCAACGATATTCAGGCCAACGATTCTGTCTCCGACTACTTATCCCGATCAAC
81 V A F N D I Q A N D S V S D Y L F P I N
301 AACATAGTCACTGTACAAAACACCGTGTAGACAATTCTAGCAACTTGTATTCCAAGAA
101 N I V T V Q N T V V D N S S N F D F Q E
361 AAATCCAACAGCCTCCAATCGTTGACCTATCAATGGGAAGTGGAAGGGTCTTCAACA
121 K S N S L Q S L T L S M G S G K G S S T
421 TGTGAAACCGGCACCGACAATACCAGCATTACTACCGTGAAGCTACCCCAAGGAGGACT
141 C E T G T D N T S I T T V E A T P R R T
481 TTGGACACATTTGGACAAAGAACATCTATTTATCGTGGTGTAACAAGGCATAGTGGACA
161 L D T F G Q R T S I Y R G V T R H R W T
541 GGAAGGTATGAAGCTCATCTTTGGGATAATAGTTGCAGAAGGAAGGACAATCCAGGAAG
181 G R Y E A H L W D N S C R R E G Q S R K
601 GGCCGCCAAGGTGGGTATGACAAAGAAGATAAAGCAGCTAGGGCTTATGACTTGGCTGCA
201 G R Q G G Y D K E D K A A R A Y D L A A
661 CTGAAGTACTGGGAACATCTACTACTACAAATTTCCAATCAGTAAGTATGAGAAAAGAG
221 L K Y W G T S T T T N F P I S N Y E K E
721 GTGGAGGAGATGAAGAACATGACAAGACAAGAATTTGTGGCAGCCATTAGAAGGAAAAGT
241 V E E M K N M T R Q E F V A A I R R K S
781 AGTGGCTTTTCTAGGGGAGCGTCCATGTATCGCGGAGTTACAAGGCATCACCAACACGGA
261 S G F S R G A S M Y R G V T R H H Q H G
841 CGATGGCAAGCAAGGATTGGCAGAGTTGCCGGAACAAAGATCTATACTTGGGAACTTTC
281 R W Q A R I G R V A G N K D L Y L G T F
901 AGTACCGAGGAGGAGGAGCTGAAGCTTACGACATAGCAGCAATAAAATTCGAGGCGCTA
301 S T E E E A A E A Y D I A A I K F R G L
961 AACGCCGTAACCAACTTCGACATGAATCGATACGACGTGAAGAGCATTTTGGAAAGCAAT
321 N A V T N F D M N R Y D V K S I L E S N
1021 ACTCTCCCATTTGGAGGAGGGGAGCAAGCGTCTCAAAGAGGCTCAGGCCTTGGAAATCT
341 T L P I G G G A A K R L K E A Q A L E S
1081 TCTAGAAAACGGGAAGAAATGATGGCTCTTGGCTCCACGTTTCACTATGCGGCTGCCGGA
361 S R K R E E M M A L G S T F H Y A A A G
1141 GCTGCCAGCCCATCAACCTCAGCCGTTTCGTAATTTGCAAGCGTACTCTTTGTTGCAGCCT
381 A A S P S T S A V R N L Q A Y S L L Q P
1201 CAGTCAACCTTTGATCAAAATGTACAACAATCCAGCCTCTACTGACTCTCCAAAACCAT
401 Q S T F D Q N V Q Q S Q P L L T L Q N H
1261 GACATTTCTCAGTACACCCACCATCATGACCCTTCTTCATACCAAAATTACATCCAAACC
421 D I S Q Y T H H H D P S S Y Q N Y I Q T
1321 CAGCTTCAGTTGCACCAGACCCAGCAGCAATACCAGCCTACCCAGCAATTCTATAATAGT
441 Q L Q L H Q T Q Q Q Y Q P T Q Q F Y N S
1381 TATGGACTTCAGAGTACACACCCAGCTTTGCTTCAAGGTCTCATGGACATGGGTCTTCT
461 Y G L Q S T H P A L L Q G L M D M G S S
1441 AGTGTGATGGATCACAACACCGGGAGCTCTAGTGGGAGCTATAGTGCTGGAGAGTATTTA
481 S V M D H N T G S S S G S Y S A G E Y L
1501 GGAAATAATGGAATTGGGTGGCTACAAATTCACAGCAAACAATGGAGTGGGTTTCAGCA
501 G N N G I G L A T N S T A N N G V G S A
1561 GAAGAGCTTGCACTTGTGAAGGTTGATTATGATATGCCTAATGGAGGAGGGTATGGGTAT
521 E E L A L V K V D Y D M P N G G G Y G Y
1621 TTTTACAATGTGGAGTGA
541 F Y N V E *
```

Supplementary Table S1. Protein and gene accession numbers used in this study

| Name          | Accession          | Name          | Accession     |
|---------------|--------------------|---------------|---------------|
| AtBBM         | AAM33803           | AtPLT1        | NP_188720.2   |
| AtANT         | AAA91040           | AtPLT2        | NP_175530.2   |
| AtAP2         | AAC13770           | AtPLT3        | AED91556.1    |
| AtERF3        | NP_175479          | MdPLT1        | MDP0000188698 |
| <i>LkBBM1</i> | KJ004517           | MdPLT2        | MDP0000182395 |
| <i>LkBBM2</i> | MH794129           | MDP0000277643 | MDP0000277643 |
| NtANT1        | AAR22388           | MDP0000211931 | MDP0000211931 |
| OsAP2         | ABF99568           | MDP0000121984 | MDP0000121984 |
| PaAP2L1       | AAG32658           | MDP0000287973 | MDP0000287973 |
| PaAP2L2       | AAG32659           | MDP0000125317 | MDP0000125317 |
| PtPLT2a       | Potri.001G018400.1 | MDP0000871080 | MDP0000871080 |
| PtPLT2b       | Potri.003G205700.1 | MDP0000137561 | MDP0000137561 |

**Supplementary Table S2. Primers used in this study**

| Primers name          | Forward primer sequence (5' - 3') | Reverse primer sequence (5' - 3') |
|-----------------------|-----------------------------------|-----------------------------------|
| <i>MdPLT1-qRT-PCR</i> | GCACCGACAATACCAGCATTACTAC         | CCTTCCTGTCCACCTATGCCTTG           |
| <i>MdPLT1-PCR</i>     | ATGGGGTCCATGAATTCAAACAAC          | TCACTCCACATTGTAAAAATACCCATACCC    |
| <i>EF-1a (Actin)</i>  | ATTCAAGTATGCCTGGGTGC              | CAGTCAGCCTGTGATGTTCC              |
| <i>NtPIN1</i>         | GGAGCTGCAGCACAAACAAGT             | ACCTTTCTTGTTATTAGTGC              |
| <i>NtPIN3</i>         | GGCACGATCTATATGTTGTG              | GCCACAAATCTGTTTATACC              |
| <i>NtPIN4</i>         | GCAGTCCCTTTACTTTCC                | CCATTCTAGGCTACCATT                |
| <i>NtPIN9</i>         | AATCACATGGTGGTCTTA                | ATAAACCCCATTTCTCTCC               |
| <i>NtYUCCA3</i>       | TCATGCACTTGAACAAGAAG              | CTTGTTGTTTAAGACCAGCG              |
| <i>NtYUCCA4</i>       | GGGTAAATGGACCTATAAT               | AAGAATAAGTGAAGGGACTCC             |
| <i>NtYUCCA6</i>       | GGGTCCAGTAATTGTAGGAGC             | TTTGAGTTGCCATAAAGAAGC             |
| <i>NtYUCCA8</i>       | ATGTGTATGGGTAAATGGTCC             | CAGATTTTCCAAGATTACAC              |
| <i>NtYUCCA9</i>       | GCGAAGATGTGTTTGGGTAA              | GCCATAAAGATGCAATACAATC            |
| <i>NtYUCCA10</i>      | GTGGAAGTGGTTATAGTTGG              | TGAAGTCTATCATAAGTTCT              |
| <i>NtL25 (Actin)</i>  | CCGTCCAAAAATCTGACCC               | TCTTCAAAGTCTTAGGTCGG              |
